# Supplementary material
Source: Research Square preprint supplement (doi:10.21203/rs.3.rs-9590273/v1)
Supplement: Supplementary file 1 [file 33b3875d3d5bfd67b509ba50.docx]

**Supplementary Material**

**Appendix**

**Table A1. Overview of the FOUNDATIONS program activities**

| **Intervention pillar** | **Key activities** |
| --- | --- |
| Demand | - Sensitizations of in and out of school adolescents on key SRHR topics - Sensitizations of first-time adolescent mothers and their male partners - Sensitization of parents and guardians of adolescent girls - Establishment of the community action cycles - Training of teachers and community change agents on SRHR |
| Supply | - Clinical, value clarifications and attitudes training to healthcare workers, including community health agents - Provision of supportive supervision and coaching to healthcare workers - Rehabilitation and provision of equipment to health facilities - Training on contraceptive supply chain management and eco-friendly clinical waste management. - Establishment of community-level safe spaces for adolescents with trained mentors - Guided visits to health facilities for adolescents |
| Advocacy | - Capacity building for local and national feminist organisations - Advocacy at local, district and national levels to implement SRHR policies and laws with engagement from feminist and women-led advocacy groups |

**Program logic model and theory of change**

Given that this is an evaluation of a complex intervention that integrates multiple sequential components (community-based and facility-based activities) implemented concomitantly with the goal of influencing the systems in which they are enacted, we surmised that changes in outcomes after the program’s initiation may be ongoing and likely have a latency period.[34–36] Thus, we hypothesized that project-associated changes in the utilization of services by adolescents would not necessarily be observed immediately after the initiation of program activities.

A visual representation of the logic model of this evaluation is presented in Figure A2**.**

**Table A2. Characteristics of the stakeholders involved in the interpretation workshops**

| **Group of Participants** | **Stakeholder Background & Roles** | **Mali** | **Niger** | **Sierra Leone** |
| --- | --- | --- | --- | --- |
| **Program Implementation Partners** |  |  |  |  |
| Local implementation actors | 5 | 8 | 5 |
| **Health System actors and Leadership** | National actors | 2 |  |  |
| Regional actors | 1 | 1 | - |
| District-level SRHR focal points | 5 | 2 | 1 |
| Other district-level actors | 2 | 2 | 2 |
| **Healthcare Workers** | SRHR providers from project-supported facilities | 5 | 4 | 5 |
| **Community stakeholders** | Religious and community leaders | - | 1 | - |
| Adolescents | 2 | 0 | 2 |
| **Total Number of Participants** | | **22** | **18** | **15** |

**FIGURE LEGENDS FOR APPENDIX**

**Figure A1**. **Inset maps of study healthcare facilities in Mali, Niger, and Sierra Leone.** Facilities have been jittered by 5km for anonymity and displayed as red dots. **Panel A**: Peripherical Healthcare Units in Kailahun, Sierra Leone. **Panel B**: Community and Referral healthcare centers in Sikasso, Koutiala, Kignan, Kadiolo and Niena in Mali. **Panel C**: Integrated healthcare centers in Maradi and Diffa in Niger. Maps were created in QGIS with data from OpenStreetMap, available under the Open Database License (CC BY-SA 2.0).[33]

**Figure A2.** Project logic model for improving SRHR outcomes among adolescent girls in Mali, Niger, and Sierra Leone.
